# Supplementary material
Source: MDPI journal article supplement (https://www.mdpi.com/1424-2818/14/5/336)
Supplement: s1 [file s1]

Table S6. The Bootstrap 95% intervals of the pairwise Fst and Cavalli-Sforza and Edwards genetic distance values between stock pairs.

Bootstrap resampling over loci

95% Confidence Interval

Fst using ENA

| pop | 1         | 2         | 3        | 4        | 5        | 6         |
|-----|-----------|-----------|----------|----------|----------|-----------|
| 2   | 0.026597  |           |          |          |          |           |
| 3   | 0.012056  | 0.039435  |          |          |          |           |
| 4   | 0.055988  | 0.034012  | 0.049325 |          |          |           |
| 5   | 0.035837  | 0.040072  | 0.035934 | 0.018674 |          |           |
| 6   | -0.007836 | -0.013096 | 0.008634 | 0.028294 | 0.005958 |           |
| 7   | 0.024281  | 0.061687  | 0.020606 | 0.125868 | 0.018682 | -0.001042 |
| 1   | 2         | 3         | 4        | 5        | 6        |           |
| 2   | 0.112890  |           |          |          |          |           |
| 3   | 0.053829  | 0.187639  |          |          |          |           |
| 4   | 0.221342  | 0.085823  | 0.232698 |          |          |           |
| 5   | 0.133531  | 0.101153  | 0.166058 | 0.106995 |          |           |
| 6   | 0.030467  | 0.088785  | 0.081721 | 0.262879 | 0.087417 |           |
| 7   | 0.086011  | 0.216891  | 0.125099 | 0.301231 | 0.262631 | 0.115319  |

Bootstrap resampling over loci

95% Confidence Interval

Dc using INA

| pop | 1        | 2        | 3        | 4        | 5        | 6        |
|-----|----------|----------|----------|----------|----------|----------|
| 2   | 0.182155 |          |          |          |          |          |
| 3   | 0.160872 | 0.188869 |          |          |          |          |
| 4   | 0.240800 | 0.187950 | 0.166871 |          |          |          |
| 5   | 0.201712 | 0.173565 | 0.158259 | 0.168431 |          |          |
| 6   | 0.174579 | 0.153780 | 0.173678 | 0.196591 | 0.159823 |          |
| 7   | 0.244113 | 0.228536 | 0.193688 | 0.243137 | 0.196719 | 0.180876 |

|   | 1        | 2        | 3        | 4        | 5        | 6        |
|---|----------|----------|----------|----------|----------|----------|
| 2 | 0.278428 |          |          |          |          |          |
| 3 | 0.258626 | 0.307429 |          |          |          |          |
| 4 | 0.359948 | 0.275390 | 0.349669 |          |          |          |
| 5 | 0.309089 | 0.296183 | 0.314396 | 0.285505 |          |          |
| 6 | 0.306838 | 0.237443 | 0.319085 | 0.338340 | 0.303587 |          |
| 7 | 0.330250 | 0.356527 | 0.301229 | 0.411157 | 0.334063 | 0.330196 |
