# Supplementary material
Source: MDPI journal article supplement (https://www.mdpi.com/1424-2818/14/5/336)
Supplement: s1 [file s1]

Table S1. Repeat motifs, primer sequences and annealing temperatures of the twelve autosomal microsatellite markers used in the study.

| Microsatellites locus<br>(reference)     | Repeat motif                  | The sequences of the used primer pairs<br>with the tags<br>(5→3) | Annealing<br>T (°C) |
|------------------------------------------|-------------------------------|------------------------------------------------------------------|---------------------|
| MTT-1<br>(Kohlmann and Kersten (2006))   | (CA)11                        | F:GTCCTCGCAATGCAAGAAAT<br>R: TTGGCTCATATTGGGTGTGA                | 55                  |
| MTT-2<br>(Kohlmann and Kersten (2006))   | (AC)8                         | F:CTGGTCTCCTCCTTGTGCTC<br>R:TGGGTGAAGGATTGGTTGTT                 | 55                  |
| MTT-3<br>(Kohlmann and Kersten (2006))   | (AGAC)3(AG)12                 | F:CCAGCAGAGCCCTACACTTC<br>R: AGGACGTGACCATCAACACA                | 55                  |
| MTT-5<br>(Kohlmann and Kersten (2006))   | (GA)4GG(GA)13                 | F:GGGAGCCAGTTCACACTCAT<br>R: GACATGAAAACGGTGCTGTG                | 55                  |
| MTT-6<br>(Kohlmann and Kersten (2006))   | (CA)16                        | F:TGTGTGAGGTGGCACAGAAT<br>R: ATGTGAGCAATGGCTGTGAG                | 55                  |
| MTT-8<br>(Kohlmann and Kersten (2006))   | (CA)12N6(CA)3(GACA)2<br>(CA)8 | F:GAAATGTCCCCACAAACCAC<br>R: GACACCGCTATCACCATCAG                | 55                  |
| MTT-9<br>(Kohlmann and Kersten (2006))   | (AC)28                        | F:CAATCTGGTGGAAGTGAGCA<br>R: ACGCGTCAGTGACAGAGAGA                | 55                  |
| MT-3<br>(developed in the present study) | (GTT)10                       | F:TTTCCCCTCACCTCAATCCT<br>R:TTTCCAAACGCTGCCAACTC                 | 58                  |
| MT-6<br>(developed in the present study) | (CTT)8                        | F:ACACCAACCATCAAACAAACCA<br>R:ATAGAAGGCGAAGGAGGGATG              | 58                  |
| MT-8<br>(developed in the present study) | (AC)11                        | F:GTCCACCCCTGCCATATCAC<br>R:TGTAACCTGGGTGCATGACTG                | 58                  |
| MFW1<br>(Crooijmans et al., 1997)        | (CA)7                         | F:FGTCCAGACTGTCATCAGGAG<br>R:GAGGTGTACACTGAGTCACGC               | 55                  |
| CypG24<br>(Baerwald & May 2004)          | (CAGA)19                      | F:CTGCCGCATCAGAGATAAACAC<br>TT<br>R: TGGCGGTAAGGGTAGACCAC        | 57                  |
