# Supplementary material
Source: MDPI journal article supplement (https://www.mdpi.com/1424-2818/14/5/336)
Supplement: s1 [file s1]

Figure S1.  
Polymorph sites in the haplotypes  
Title: Genetic structure and diversity of native Tench (*Tinca tinca* L. 1758) populations in Hungary - Establishment of basic knowledge base for a breeding program.  
Authors: Fatema Ali Al Fatle, Erika Edviné Meleg, Zoltán Sallai, Béla Urbányi, Balázs Kovács, Tamás Molnár and István Lehoczky

MATRIX

|       |                 |   |
|-------|-----------------|---|
| [     | 10              | ] |
|       | *               |   |
| Hap1  | GGAAATAATCGAAG  |   |
| Hap2  | ..G..G.G.TCGC.  |   |
| Hap3  | ...G.....       |   |
| Hap4  | ..G.G..G.TCGC.  |   |
| Hap5  | ...G..C....     |   |
| Hap6  | ..G.G..G.TCGCA  |   |
| Hap7  | ..G....G.TCGC.  |   |
| Hap8  | ..G....G.TCGCA  |   |
| Hap9  | ..G....G.ACGC.  |   |
| Hap10 | ....G.....      |   |
| Hap11 | ....G.....A     |   |
| Hap12 | ....G.....C.... |   |
| Hap13 | ...G.....A      |   |
| Hap14 | ..G.G..G.T.GC.  |   |
| Hap15 | .AG.G..G.TCGC.  |   |
| Hap16 | ...GG.....      |   |
| Hap17 | ..G..G.G.TCGCA  |   |
| Hap18 | ..G.GG.G.TCGC.  |   |
| Hap19 | ...G.G.....     |   |
| Hap20 | A...G.....      |   |
