# Supplementary material
Source: MDPI journal article supplement (https://www.mdpi.com/1424-2818/14/5/336)
Supplement: s1 [file s1]

Table S5.

The mean log likelihood data and Evanno's delta K of the hierarchical STRUCTURE analysis.

| # K | Reps | Mean LnP(K) | Stdev LnP(K) | Ln'(K)  | Ln''(K) | Delta K  |
|-----|------|-------------|--------------|---------|---------|----------|
| 1   | 10   | -3428.4700  | 0.0483       | NA      | NA      | NA       |
| 2   | 10   | -3390.0200  | 5.0376       | 38.45   | 1.38    | 0.273940 |
| 3   | 10   | -3352.9500  | 16.4488      | 37.07   | 0.36    | 0.021886 |
| 4   | 10   | -3316.2400  | 11.4254      | 36.71   | 46.47   | 4.067243 |
| 5   | 10   | -3326.0000  | 17.2303      | -9.76   | 41.42   | 2.403900 |
| 6   | 10   | -3377.1800  | 72.2788      | -51.18  | 87.78   | 1.214465 |
| 7   | 10   | -3516.1400  | 53.9164      | -138.96 | 71.51   | 1.326313 |
| 8   | 10   | -3583.5900  | 80.2669      | -67.45  | 23.04   | 0.287042 |
| 9   | 10   | -3628.0000  | 77.1919      | -44.41  | 46.15   | 0.597860 |
| 10  | 10   | -3718.5600  | 151.2057     | -90.56  | NA      | NA       |
