# Supplementary material
Source: MDPI journal article supplement (https://www.mdpi.com/1424-2818/14/5/336)
Supplement: s1 [file s1]

**Table S2. Sequences of the microsatellite markers developed in this study**

**>MT3**

**TTTCAAACGCTGCCAACTC**GGCCGGGTGGACAGAAAAACCCATTGATTGTACTTTGGAGGC  
AAAAA**CAACAACAACAACAACAACA**CTAATTCATTACCCAGCCACTTGGCATTGAAA  
TGTAATAT**AGGATTGAGGTGAGGGGAAA**

**>MT6**

**ACACCAACCATCAAACAAACCA**TAGTTTCTTTGACTAACAGTGTCTTATCCCCCTCTGCCCC  
TT**CCTCCTCCTCCTCCTCCTCCT**GTGTTTCATCTTAAATAGCTTTTCATATTTTCTTCTCTTAC  
**ATCCCTCCTTCGCCTTCTAT**

**>MT8**

**GTCCACCCCTGCCATATCAC**CTGTTCTAAGCGGTCTCGCCCCAATCATTCAAAGCTATGAAGT  
TGAAGACAGATCTTGGTTT**ACACACACACACACACACACACT**GCAGAGAAAAAACGCAAGA  
GCTGCTTT**CAGTCATGCACCCAGTTACA**
