# Supplementary material
Source: MDPI journal article supplement (https://www.mdpi.com/1424-2818/14/5/336)
Supplement: s1 [file s1]

Table S4. Sequences of the cytochrome b gene haplotypes.

>Hap\_1

ATGGCAAGCCTACGAAAAACCCACCCCCTAATTAATAATTGCTAACGATGCACTAGTTGATTTACCAACACCCCTC  
TAACATCTCAGTATGATGAAACTTCGGATCCCTCCTTGGACTATGCTTAATTATCCAAATCTTAACAGGATTATT  
TTAGCTATACATTACACCTCAAATATTTCAACCGCATTCTCGTCAGTAAACCACATTTGCCGTGATGTAAACTA  
TGGCTGACTTATTCGTAACCTACACGCTAATGGGGCATCATTCTTCTTTATCTGCCTTTATATACATATCGCCCGA  
GGATTATATTACGGATCATACCTTTACAAAGAAACCTGAAATATTGGAGTAGTTCTTTTTCTATTAGTAATAATA  
ACAGCCTTTGTTGGCTACGTCTGCCATGAGGACAAATATCCTTTTGAGGCGCAACAGTAATTACCAACCTACT  
ATCAGCAGTTCCCTACATAGGAGATGCTTTAGTTCAATGAATCTGAGGTGGCTTCTCAGTAGACAATGCAACAC  
TTACGCGATTCTTCGATTCCACTTCTTACTGCCATTCATTGTTACAGCCGCCACCCTCCTACACCTGCTATTTTTC  
CACGAAACGGGATCA

>Hap\_2

ATGGCAAGCCTACGAAAAACCCACCCCCTAATTAATAATTGCTAACGATGCACTAGTTGATTTACCAACACCCCTC  
TAACATCTCAGTATGATGAAACTTCGGGTCCCTCCTTGGACTATGCTTAATTATCCAAATCTTAACAGGATTATT  
TTAGCTATACATTACACCTCAAATATTTCAACCGCATTCTCGTCAGTAAACCACATTTGCCGGGATGTAAACTA  
TGGCTGACTTATTCGTAACCTACACGCTAATGGGGCATCATTCTTCTTTATCTGCCTTTATATACATATCGCCCGA  
GGATTATATTACGGATCATACCTTTACAAAGAGACCTGAAATATTGGAGTAGTTCTTTTTCTATTAGTAATAATA  
ACAGCCTTTGTTGGCTACGTCTGCCATGAGGACAAATATCCTTTTGAGGCGCAACAGTAATTACTAACCTACT  
ATCAGCAGTTCCCTACATAGGAGATGCTTTAGTTCAATGAATCTGAGGTGGCTTCTCAGTAGACAATGCAACAC  
TTACGCGATTCTTCGATTCCACTTCTTACTCCCATTCATTGTTGCCGCCGCCACCCTCCTACACCTGCTATTTTTC  
CACGAAACGGGATCA

>Hap\_3

ATGGCAAGCCTACGAAAAACCCACCCCCTAATTAATAATTGCTAACGATGCACTAGTTGATTTACCAACACCCCTC  
TAACATCTCAGTATGATGAAACTTCGGATCCCTCCTTGGACTATGCTTAATTATCCAAATCTTAACAGGATTATT  
TTAGCTATACATTACACCTCAGATATTTCAACCGCATTCTCGTCAGTAAACCACATTTGCCGTGATGTAAACTA  
TGGCTGACTTATTCGTAACCTACACGCTAATGGGGCATCATTCTTCTTTATCTGCCTTTATATACATATCGCCCGA  
GGATTATATTACGGATCATACCTTTACAAAGAAACCTGAAATATTGGAGTAGTTCTTTTTCTATTAGTAATAATA  
ACAGCCTTTGTTGGCTACGTCTGCCATGAGGACAAATATCCTTTTGAGGCGCAACAGTAATTACCAACCTACT  
ATCAGCAGTTCCCTACATAGGAGATGCTTTAGTTCAATGAATCTGAGGTGGCTTCTCAGTAGACAATGCAACAC  
TTACGCGATTCTTCGATTCCACTTCTTACTGCCATTCATTGTTACAGCCGCCACCCTCCTACACCTGCTATTTTTC  
CACGAAACGGGATCA

>Hap\_4

ATGGCAAGCCTACGAAAAACCCACCCCCTAATTAATAATTGCTAACGATGCACTAGTTGATTTACCAACACCCCTC  
TAACATCTCAGTATGATGAAACTTCGGGTCCCTCCTTGGACTATGCTTAATTATCCAAATCTTAACAGGATTATT  
TTAGCTATACATTACACCTCAGATATTTCAACCGCATTCTCGTCAGTAAACCACATTTGCCGTGATGTAAACTA  
TGGCTGACTTATTCGTAACCTACACGCTAATGGGGCATCATTCTTCTTTATCTGCCTTTATATACATATCGCCCGA  
GGATTATATTACGGATCATACCTTTACAAAGAGACCTGAAATATTGGAGTAGTTCTTTTTCTATTAGTAATAATA  
ACAGCCTTTGTTGGCTACGTCTGCCATGAGGACAAATATCCTTTTGAGGCGCAACAGTAATTACTAACCTACT  
ATCAGCAGTTCCCTACATAGGAGATGCTTTAGTTCAATGAATCTGAGGTGGCTTCTCAGTAGACAATGCAACAC  
TTACGCGATTCTTCGATTCCACTTCTTACTCCCATTCATTGTTGCCGCCGCCACCCTCCTACACCTGCTATTTTTC  
CACGAAACGGGATCA

>Hap\_5

ATGGCAAGCCTACGAAAAACCCACCCCCTAATTAATAATTGCTAACGATGCACTAGTTGATTTACCAACACCCCTC  
TAACATCTCAGTATGATGAAACTTCGGATCCCTCCTTGGACTATGCTTAATTATCCAAATCTTAACAGGATTATT  
TTTAGCTATACATTACACCTCAGATATTTCAACCGCATTCTCGTCAGTAAACCACATTTGCCGTGATGTAAACTA  
TGGCTGACTTATTCGTAACCTACACGCTAATGGGGCATCATTCTTTATCTGCCTTTATATACATATCGCCCCGA  
GGATTATATTACGGATCATACCTTTACAAAGAAACCTGAAATATTGGAGTAGTTCTTTTTCTATTAGTAATAATA  
ACAGCCTTTGTCGGCTACGTCCTGCCATGAGGACAAATATCCTTTTGAGGCGCAACAGTAATTACCAACCTACT  
ATCAGCAGTTCCCTACATAGGAGATGCTTTAGTTCAATGAATCTGAGGTGGCTTCTCAGTAGACAATGCAACAC  
TTACGCGATTCTTCGCATTCCACTTCTTACTGCCATTCATTGTTACAGCCGCCACCCTCCTACACCTGCTATTTTTA  
CACGAAACGGGATCA

>Hap\_6

ATGGCAAGCCTACGAAAAACCCACCCCCTAATTAATAATTGCTAACGATGCACTAGTTGATTTACCAACACCCCTC  
TAACATCTCAGTATGATGAAACTTCGGGTCCCTCCTTGGACTATGCTTAATTATCCAAATCTTAACAGGATTATT  
TTTAGCTATACATTACACCTCAGATATTTCAACCGCATTCTCGTCAGTAAACCACATTTGCCGTGATGTAAACTA  
TGGCTGACTTATTCGTAACCTACACGCTAATGGGGCATCATTCTTTATCTGCCTTTATATACATATCGCCCCGA  
GGATTATATTACGGATCATACCTTTACAAAGAGACCTGAAATATTGGAGTAGTTCTTTTTCTATTAGTAATAATA  
ACAGCCTTTGTTGGCTACGTCCTGCCATGAGGACAAATATCCTTTTGAGGCGCAACAGTAATTACTAACCTACT  
ATCAGCAGTTCCCTACATAGGAGATGCTTTAGTTCAATGAATCTGAGGTGGCTTCTCAGTAGACAATGCAACAC  
TTACGCGATTCTTCGCATTCCACTTCTTACTCCCATTCATTGTTGCCGCCGCCACCCTCCTACACCTGCTATTTTTA  
CACGAAACAGGATCA

>Hap\_7

ATGGCAAGCCTACGAAAAACCCACCCCCTAATTAATAATTGCTAACGATGCACTAGTTGATTTACCAACACCCCTC  
TAACATCTCAGTATGATGAAACTTCGGGTCCCTCCTTGGACTATGCTTAATTATCCAAATCTTAACAGGATTATT  
TTTAGCTATACATTACACCTCAAATATTTCAACCGCATTCTCGTCAGTAAACCACATTTGCCGTGATGTAAACTA  
TGGCTGACTTATTCGTAACCTACACGCTAATGGGGCATCATTCTTTATCTGCCTTTATATACATATCGCCCCGA  
GGATTATATTACGGATCATACCTTTACAAAGAGACCTGAAATATTGGAGTAGTTCTTTTTCTATTAGTAATAATA  
ACAGCCTTTGTTGGCTACGTCCTGCCATGAGGACAAATATCCTTTTGAGGCGCAACAGTAATTACTAACCTACT  
ATCAGCAGTTCCCTACATAGGAGATGCTTTAGTTCAATGAATCTGAGGTGGCTTCTCAGTAGACAATGCAACAC  
TTACGCGATTCTTCGCATTCCACTTCTTACTCCCATTCATTGTTGCCGCCGCCACCCTCCTACACCTGCTATTTTTA  
CACGAAACGGGATCA

>Hap\_8

ATGGCAAGCCTACGAAAAACCCACCCCCTAATTAATAATTGCTAACGATGCACTAGTTGATTTACCAACACCCCTC  
TAACATCTCAGTATGATGAAACTTCGGGTCCCTCCTTGGACTATGCTTAATTATCCAAATCTTAACAGGATTATT  
TTTAGCTATACATTACACCTCAAATATTTCAACCGCATTCTCGTCAGTAAACCACATTTGCCGTGATGTAAACTA  
TGGCTGACTTATTCGTAACCTACACGCTAATGGGGCATCATTCTTTATCTGCCTTTATATACATATCGCCCCGA  
GGATTATATTACGGATCATACCTTTACAAAGAGACCTGAAATATTGGAGTAGTTCTTTTTCTATTAGTAATAATA  
ACAGCCTTTGTTGGCTACGTCCTGCCATGAGGACAAATATCCTTTTGAGGCGCAACAGTAATTACTAACCTACT  
ATCAGCAGTTCCCTACATAGGAGATGCTTTAGTTCAATGAATCTGAGGTGGCTTCTCAGTAGACAATGCAACAC  
TTACGCGATTCTTCGCATTCCACTTCTTACTCCCATTCATTGTTGCCGCCGCCACCCTCCTACACCTGCTATTTTTA  
CACGAAACAGGATCA

>Hap\_9

ATGGCAAGCCTACGAAAAACCCACCCCCTAATTAATAATTGCTAACGATGCACTAGTTGATTTACCAACACCCCTC  
TAACATCTCAGTATGATGAAACTTCGGGTCCCTCCTTGGACTATGCTTAATTATCCAAATCTTAACAGGATTATT  
TTTAGCTATACATTACACCTCAAATATTTCAACCGCATTCTCGTCAGTAAACCACATTTGCCGTGATGTAAACTA

TGGCTGACTTATTCGTAACCTACACGCTAATGGGGCATCATTCTTCTTTATCTGCCTTTATATACATATCGCCCCGA  
GGATTATATTACGGATCATACCTTTACAAAGAGACCTGAAATATTGGAGTAGTTCTTTTTCTATTAGTAATAATA  
ACAGCCTTTGTTGGCTACGTCTGCCATGAGGACAAATATCCTTTTGAGGCGCAACAGTAATTACAAACCTACT  
ATCAGCAGTTCCCTACATAGGAGATGCTTTAGTTCAATGAATCTGAGGTGGCTTCTCAGTAGACAATGCAACAC  
TTACGCGATTCTTCGCATTCCACTTCTTACTCCCATTCATTGTTGCCGCCGCCACCCTCCTACACCTGCTATTTTTA  
CACGAAACGGGATCA

>Hap\_10

ATGGCAAGCCTACGAAAAACCCACCCCCTAATTAATAATTGCTAACGATGCACTAGTTGATTTACCAACACCCTC  
TAACATCTCAGTATGATGAAACTTCGGATCCCTCCTTGGACTATGCTTAATTATCCAAATCTTAACAGGATTATT  
TTTAGCTATACATTACACCTCAAATATTTCAACCGCATTCTCGTCAGTAAACCACATTTGCCGGGATGTAAACTA  
TGGCTGACTTATTCGTAACCTACACGCTAATGGGGCATCATTCTTCTTTATCTGCCTTTATATACATATCGCCCCGA  
GGATTATATTACGGATCATACCTTTACAAAGAAACCTGAAATATTGGAGTAGTTCTTTTTCTATTAGTAATAATA  
ACAGCCTTTGTTGGCTACGTCTGCCATGAGGACAAATATCCTTTTGAGGCGCAACAGTAATTACCAACCTACT  
ATCAGCAGTTCCCTACATAGGAGATGCTTTAGTTCAATGAATCTGAGGTGGCTTCTCAGTAGACAATGCAACAC  
TTACGCGATTCTTCGCATTCCACTTCTTACTGCCATTCAATTGTTACAGCCGCCACCCTCCTACACCTGCTATTTTTA  
CACGAAACGGGATCA

>Hap\_11

ATGGCAAGCCTACGAAAAACCCACCCCCTAATTAATAATTGCTAACGATGCACTAGTTGATTTACCAACACCCTC  
TAACATCTCAGTATGATGAAACTTCGGATCCCTCCTTGGACTATGCTTAATTATCCAAATCTTAACAGGATTATT  
TTTAGCTATACATTACACCTCAGATATTTCAACCGCATTCTCGTCAGTAAACCACATTTGCCGTGATGTAAACTA  
TGGCTGACTTATTCGTAACCTACACGCTAATGGGGCATCATTCTTCTTTATCTGCCTTTATATACATATCGCCCCGA  
GGATTATATTACGGATCATACCTTTACAAAGAAACCTGAAATATTGGAGTAGTTCTTTTTCTATTAGTAATAATA  
ACAGCCTTTGTTGGCTACGTCTGCCATGAGGACAAATATCCTTTTGAGGCGCAACAGTAATTACCAACCTACT  
ATCAGCAGTTCCCTACATAGGAGATGCTTTAGTTCAATGAATCTGAGGTGGCTTCTCAGTAGACAATGCAACAC  
TTACGCGATTCTTCGCATTCCACTTCTTACTGCCATTCAATTGTTACAGCCGCCACCCTCCTACACCTGCTATTTTTA  
CACGAAACAGGATCA

>Hap\_12

ATGGCAAGCCTACGAAAAACCCACCCCCTAATTAATAATTGCTAACGATGCACTAGTTGATTTACCAACACCCTC  
TAACATCTCAGTATGATGAAACTTCGGATCCCTCCTTGGACTATGCTTAATTATCCAAATCTTAACAGGATTATT  
TTTAGCTATACATTACACCTCAAATATTTCAACCGCATTCTCGTCAGTAAACCACATTTGCCGTGATGTAAACTA  
TGGCTGACTTATTCGTAACCTACACGCTAATGGGGCATCATTCTTCTTTATCTGCCTTTATATACATATCGCCCCGA  
GGATTATATTACGGATCATACCTTTACAAAGAAACCTGAAATATTGGAGTAGTTCTTTTTCTATTAGTAATAATA  
ACAGCCTTTGTCGGCTACGTCTGCCATGAGGACAAATATCCTTTTGAGGCGCAACAGTAATTACCAACCTACT  
ATCAGCAGTTCCCTACATAGGAGATGCTTTAGTTCAATGAATCTGAGGTGGCTTCTCAGTAGACAATGCAACAC  
TTACGCGATTCTTCGCATTCCACTTCTTACTGCCATTCAATTGTTACAGCCGCCACCCTCCTACACCTGCTATTTTTA  
CACGAAACGGGATCA

>Hap\_13

ATGGCAAGCCTACGAAAAACCCACCCCCTAATTAATAATTGCTAACGATGCACTAGTTGATTTACCAACACCCTC  
TAACATCTCAGTATGATGAAACTTCGGATCCCTCCTTGGACTATGCTTAATTATCCAAATCTTAACAGGATTATT  
TTTGGCTATACATTACACCTCAAATATTTCAACCGCATTCTCGTCAGTAAACCACATTTGCCGTGATGTAAACTA  
TGGCTGACTTATTCGTAACCTACACGCTAATGGGGCATCATTCTTCTTTATCTGCCTTTATATACATATCGCCCCGA  
GGATTATATTACGGATCATACCTTTACAAAGAAACCTGAAATATTGGAGTAGTTCTTTTTCTATTAGTAATAATA  
ACAGCCTTTGTTGGCTACGTCTGCCATGAGGACAAATATCCTTTTGAGGCGCAACAGTAATTACCAACCTACT

ATCAGCAGTTCCTACATAGGAGATGCTTTAGTTCAATGAATCTGAGGTGGCTTCTCAGTAGACAATGCAACAC  
TTACGCGATTCTTCGCATTCCACTTCTTACTGCCATTCATTGTTACAGCCGCCACCCTCCTACACCTGCTATTTTAA  
CACGAAACAGGATCA

>Hap\_14

ATGGCAAGCCTACGAAAAACCCACCCCCTAATTAATAATTGCTAACGATGCACTAGTTGATTTACCAACACCCTC  
TAACATCTCAGTATGATGAAACTTCGGGTCCCTCCTTGACTATGCTTAATTATCCAAATCTTAACAGGATTATT  
TTAGCTATACATTACACCTCAGATATTTCAACCGCATTCTCGTCAGTAAACCACATTTGCCGTGATGTAAACTA  
TGGCTGACTTATTCGTAACCTACACGCTAATGGGGCATCATTCTTCTTTATCTGCCTTTATATACATATCGCCCCGA  
GGATTATATTACGGATCATACCTTTACAAAGAGACCTGAAATATTGGAGTAGTTCTTTTTCTATTAGTAATAATA  
ACAGCCTTTGTTGGCTACGTCCTGCCATGAGGACAAATATCCTTTTGAGGCGCAACAGTAATTACTAACCTACT  
ATCAGCAGTTCCTACATAGGAGATGCTTTAGTTCAATGAATCTGAGGTGGCTTCTCAGTAGACAATGCAACAC  
TTACGCGATTCTTCGCATTCCACTTCTTACTGCCATTCATTGTTGCCGCCGCCACCCTCCTACACCTGCTATTTTAA  
CACGAAACGGGATCA

>Hap\_15

ATGGCAAGCCTACGAAAAACCCACCCCCTAATTAATAATTGCTAACGATGCACTAATTGATTTACCAACACCCTCT  
AACATCTCAGTATGATGAAACTTCGGGTCCCTCCTTGACTATGCTTAATTATCCAAATCTTAACAGGATTATTT  
TTAGCTATACATTACACCTCAGATATTTCAACCGCATTCTCGTCAGTAAACCACATTTGCCGTGATGTAAACTAT  
GGCTGACTTATTCGTAACCTACACGCTAATGGGGCATCATTCTTCTTTATCTGCCTTTATATACATATCGCCCCGA  
GGATTATATTACGGATCATACCTTTACAAAGAGACCTGAAATATTGGAGTAGTTCTTTTTCTATTAGTAATAATA  
ACAGCCTTTGTTGGCTACGTCCTGCCATGAGGACAAATATCCTTTTGAGGCGCAACAGTAATTACTAACCTACT  
ATCAGCAGTTCCTACATAGGAGATGCTTTAGTTCAATGAATCTGAGGTGGCTTCTCAGTAGACAATGCAACAC  
TTACGCGATTCTTCGCATTCCACTTCTTACTCCCATTCATTGTTGCCGCCGCCACCCTCCTACACCTGCTATTTTAA  
CACGAAACGGGATCA

>Hap\_16

ATGGCAAGCCTACGAAAAACCCACCCCCTAATTAATAATTGCTAACGATGCACTAGTTGATTTACCAACACCCTC  
TAACATCTCAGTATGATGAAACTTCGGATCCCTCCTTGACTATGCTTAATTATCCAAATCTTAACAGGATTATT  
TTAGCTATACATTACACCTCAGATATTTCAACCGCATTCTCGTCAGTAAACCACATTTGCCGGGATGTAAACTA  
TGGCTGACTTATTCGTAACCTACACGCTAATGGGGCATCATTCTTCTTTATCTGCCTTTATATACATATCGCCCCGA  
GGATTATATTACGGATCATACCTTTACAAAGAAACCTGAAATATTGGAGTAGTTCTTTTTCTATTAGTAATAATA  
ACAGCCTTTGTTGGCTACGTCCTGCCATGAGGACAAATATCCTTTTGAGGCGCAACAGTAATTACCAACCTACT  
ATCAGCAGTTCCTACATAGGAGATGCTTTAGTTCAATGAATCTGAGGTGGCTTCTCAGTAGACAATGCAACAC  
TTACGCGATTCTTCGCATTCCACTTCTTACTGCCATTCATTGTTACAGCCGCCACCCTCCTACACCTGCTATTTTAA  
CACGAAACGGGATCA

>Hap\_17

ATGGCAAGCCTACGAAAAACCCACCCCCTAATTAATAATTGCTAACGATGCACTAGTTGATTTACCAACACCCTC  
TAACATCTCAGTATGATGAAACTTCGGGTCCCTCCTTGACTATGCTTAATTATCCAAATCTTAACAGGATTATT  
TTAGCTATACATTACACCTCAAATATTTCAACCGCATTCTCGTCAGTAAACCACATTTGCCGGGATGTAAACTA  
TGGCTGACTTATTCGTAACCTACACGCTAATGGGGCATCATTCTTCTTTATCTGCCTTTATATACATATCGCCCCGA  
GGATTATATTACGGATCATACCTTTACAAAGAGACCTGAAATATTGGAGTAGTTCTTTTTCTATTAGTAATAATA  
ACAGCCTTTGTTGGCTACGTCCTGCCATGAGGACAAATATCCTTTTGAGGCGCAACAGTAATTACTAACCTACT  
ATCAGCAGTTCCTACATAGGAGATGCTTTAGTTCAATGAATCTGAGGTGGCTTCTCAGTAGACAATGCAACAC  
TTACGCGATTCTTCGCATTCCACTTCTTACTCCCATTCATTGTTGCCGCCGCCACCCTCCTACACCTGCTATTTTAA  
CACGAAACAGGATCA

>Hap\_18

ATGGCAAGCCTACGAAAAACCCACCCCCTAATTAATAATTGCTAACGATGCACTAGTTGATTTACCAACACCCTC  
TAACATCTCAGTATGATGAACTTCGGGTCCTCCTTGGACTATGCTTAATTATCCAAATCTTAACAGGATTATT  
TTTAGCTATACATTACACCTCAGATATTTCAACCGCATTCTCGTCAGTAAACCACATTTGCCGGGATGTAAACTA  
TGGCTGACTTATTCGTAACCTACACGCTAATGGGGCATCATTCTTCTTTATCTGCCTTTATATACATATCGCCCGA  
GGATTATATTACGGATCATACCTTTACAAAGAGACCTGAAATATTGGAGTAGTTCTTTTTCTATTAGTAATAATA  
ACAGCCTTTGTTGGCTACGTCTGCCATGAGGACAAATATCCTTTTGAGGCGCAACAGTAATTACTAACCTACT  
ATCAGCAGTTCCCTACATAGGAGATGCTTTAGTTCAATGAATCTGAGGTGGCTTCTCAGTAGACAATGCAACAC  
TTACGCGATTCTTCGCATTCCACTTCTTACTCCCATTCAATTGTTGCCGCCGCCACCCTCCTACACCTGCTATTTTTC  
CACGAAACGGGATCA

>Hap\_19

ATGGCAAGCCTACGAAAAACCCACCCCCTAATTAATAATTGCTAACGATGCACTAGTTGATTTACCAACACCCTC  
TAACATCTCAGTATGATGAACTTCGGATCCCTCCTTGGACTATGCTTAATTATCCAAATCTTAACAGGATTATT  
TTTAGCTATACATTACACCTCAGATATTTCAACCGCATTCTCGTCAGTAAACCACATTTGCCGTGATGTAAACTA  
TGGCTGACTTATTCGTAACCTACACGCTAATGGGGCATCATTCTTCTTTATCTGCCTTTATATACATATCGCCCGA  
GGATTATATTACGGATCGTACCTTTACAAAGAAACCTGAAATATTGGAGTAGTTCTTTTTCTATTAGTAATAATA  
ACAGCCTTTGTTGGCTACGTCTGCCATGAGGACAAATATCCTTTTGAGGCGCAACAGTAATTACCAACCTACT  
ATCAGCAGTTCCCTACATAGGAGATGCTTTAGTTCAATGAATCTGAGGTGGCTTCTCAGTAGACAATGCAACAC  
TTACGCGATTCTTCGCATTCCACTTCTTACTGCCATTCAATTGTTACAGCCGCCACCCTCCTACACCTGCTATTTTTC  
CACGAAACGGGATCA

>Hap\_20

ATGGCAAGCCTACGAAAAACCCACCCCCTAATTAATAATTGCTAACAAATGCACTAGTTGATTTACCAACACCCTCT  
AACATCTCAGTATGATGAACTTCGGATCCCTCCTTGGACTATGCTTAATTATCCAAATCTTAACAGGATTATTT  
TTAGCTATACATTACACCTCAGATATTTCAACCGCATTCTCGTCAGTAAACCACATTTGCCGTGATGTAAACTAT  
GGCTGACTTATTCGTAACCTACACGCTAATGGGGCATCATTCTTCTTTATCTGCCTTTATATACATATCGCCCGA  
GGATTATATTACGGATCATACCTTTACAAAGAAACCTGAAATATTGGAGTAGTTCTTTTTCTATTAGTAATAATA  
ACAGCCTTTGTTGGCTACGTCTGCCATGAGGACAAATATCCTTTTGAGGCGCAACAGTAATTACCAACCTACT  
ATCAGCAGTTCCCTACATAGGAGATGCTTTAGTTCAATGAATCTGAGGTGGCTTCTCAGTAGACAATGCAACAC  
TTACGCGATTCTTCGCATTCCACTTCTTACTGCCATTCAATTGTTACAGCCGCCACCCTCCTACACCTGCTATTTTTC  
CACGAAACGGGATCA
